# Supplementary material for: Implementing the Countrywide Mortality Surveillance in Action in Mozambique: How Much Did It Cost?
Source: PubMed Central journal article supplement (PMC10160867; doi:10.4269/ajtmh.22-0438), 2023-04-10
Supplement: tpmd220438.SD1.pdf [file tpmd220438.SD1.pdf]

Supplementary Figure 1. Start-up fixed COMSA costs (%)

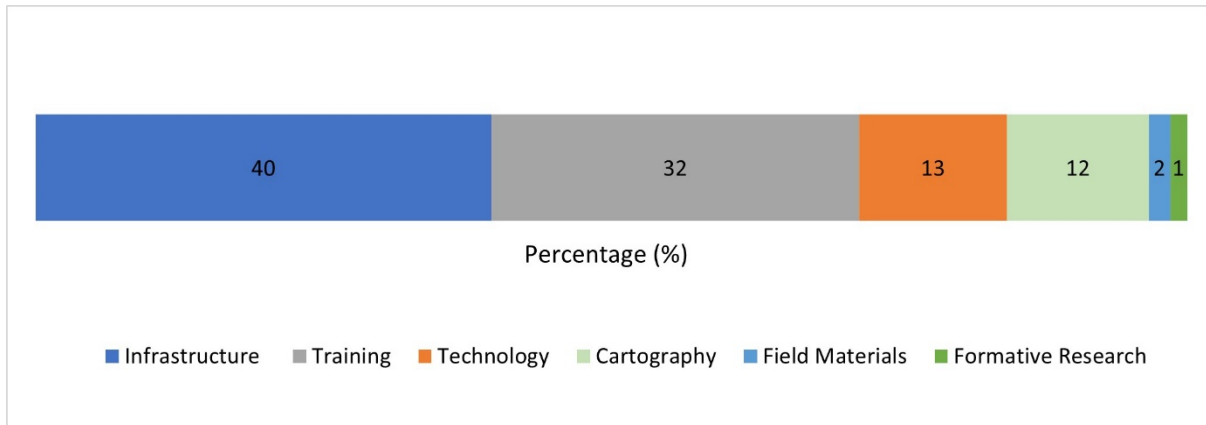

Supplementary Figure 2. Average annual COMSA operating costs (%)

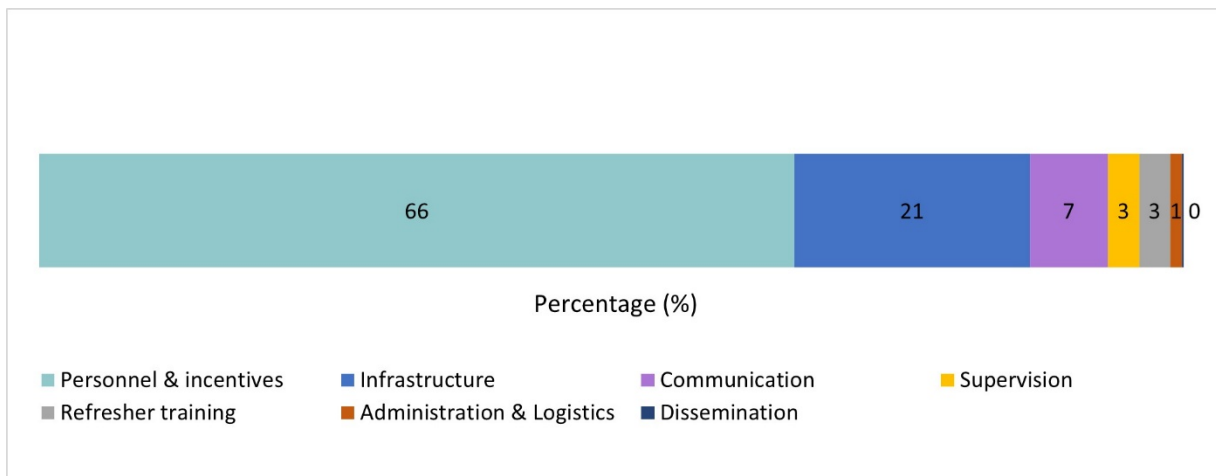

Supplementary Table 1. Average annual operating costs at provincial levels (2019-2020)

| <b>Categories</b>                                                         | Manica<br>n=85  | Niassa<br>n=40  | Inhambane<br>n=49 | Gaza<br>n=36    | Maputo<br>Provincia<br>n=36 | Maputo<br>Cidade<br>n=35 | Cabo<br>Delgado<br>n=113 | Tete<br>n=106   | Zambézia<br>n=118 | Nampula<br>n=53 | Sofala<br>n=29  |
|---------------------------------------------------------------------------|-----------------|-----------------|-------------------|-----------------|-----------------------------|--------------------------|--------------------------|-----------------|-------------------|-----------------|-----------------|
| Personnel & incentives (\$)                                               | 35,642.2        | 19,084.0        | 23,771.8          | 19,698.1        | 19,160.9                    | 19,129.4                 | 44,556.7                 | 32,886.4        | 42,676.3          | 26,389.9        | 15,520.6        |
| Infrastructure & maintenance (\$)                                         | 14,250.0        | 10,180.4        | 7,417.5           | 10,876.6        | 5,524.9                     | 3,435.9                  | 19,689.1                 | 6,227.4         | 8,103.1           | 11,817.1        | 5,161.4         |
| Administration/logistics & other (\$)                                     | 487.2           | 497.9           | 70.8              | 116.7           | 209.1                       | 52.6                     | 322.9                    | 342.6           | 335.0             | 240.7           | 128.0           |
| Supervision (provincial only) (\$)                                        | 16,152.9        | 8,973.9         | 10,619.1          | 3,655.6         | 3,655.6                     | 3,655.6                  | 14,866.7                 | 14,866.7        | 14,866.7          | 8,495.2         | 8,495.2         |
| Communication (\$)                                                        | 5,985.9         | 1,692.1         | 3,313.6           | 2,699.8         | 3,284.5                     | 2,191.5                  | 6,957.4                  | 4,129.0         | 5,429.4           | 3,943.9         | 1,378.0         |
| Refresher training (\$)                                                   | 1,038.1         | 488.5           | 598.4             | 439.7           | 439.7                       | 439.7                    | 4,699.7                  | 5,574.6         | 8,720.3           | 2,307.1         | 2,014.0         |
| <b>Total average annual operating costs per province (\$)</b>             | <b>73,556.3</b> | <b>40,916.8</b> | <b>45,791.2</b>   | <b>37,486.5</b> | <b>32,274.7</b>             | <b>28,904.7</b>          | <b>91,092.5</b>          | <b>64,026.7</b> | <b>80,130.8</b>   | <b>53,193.9</b> | <b>32,697.2</b> |
| <b>Total average annual operating costs per cluster per province (\$)</b> | <b>865.4</b>    | <b>1022.9</b>   | <b>934.5</b>      | <b>1041.3</b>   | <b>896.5</b>                | <b>825.8</b>             | <b>806.1</b>             | <b>604.0</b>    | <b>679.1</b>      | <b>1003.7</b>   | <b>1127.5</b>   |

\*n= number of COMSA clusters per province

Supplementary Table 2. Assessment costs per province (2019-2020)

| <b>Categories</b>                         | Manica<br>n=85  | Niassa<br>n=40  | Inhambane<br>n=49 | Gaza<br>n=36    | Maputo<br>Provincia<br>n=36 | Maputo<br>Cidade<br>n=35 | Cabo<br>Delgado<br>n=113 | Tete<br>n=106   | Zambézia<br>n=118 | Nampula<br>n=53 | Sofala<br>n=29  |
|-------------------------------------------|-----------------|-----------------|-------------------|-----------------|-----------------------------|--------------------------|--------------------------|-----------------|-------------------|-----------------|-----------------|
| Personnel & incentives (\$)               | 52,970.9        | 24,927.5        | 30,536.2          | 22,434.7        | 22,391.8                    | 21,858.9                 | 70,419.3                 | 66,052.9        | 73,536.1          | 33,028.9        | 18,072.4        |
| Infrastructure, maintenance & travel (\$) | 19,052.8        | 8,966.0         | 10,983.4          | 8,069.4         | 8,073.5                     | 7,841.0                  | 25,329.0                 | 23,760.0        | 26,449.8          | 11,880.0        | 6,500.4         |
| Training (\$)                             | 961.6           | 452.5           | 554.3             | 407.3           | 407.3                       | 396.8                    | 1,278.3                  | 1,199.2         | 1,334.9           | 599.6           | 328.1           |
| Other (communication, catering, etc.)     | 6,045.7         | 2,845.0         | 3,485.2           | 2,560.5         | 2,560.5                     | 2,489.3                  | 8,037.2                  | 7,539.3         | 8,392.8           | 3,769.7         | 2,062.6         |
| <b>Total (\$)</b>                         | <b>79,031.0</b> | <b>37,191.1</b> | <b>45,559.1</b>   | <b>33,472.0</b> | <b>33,433.0</b>             | <b>32,586.1</b>          | <b>105,063.9</b>         | <b>98,551.4</b> | <b>109,713.6</b>  | <b>49,278.2</b> | <b>26,963.5</b> |

\*n= number of COMSA clusters per province
